# Supplementary material for: Intracellular biomass flocculation as a key mechanism of rapid bacterial killing by cationic, amphipathic antimicrobial peptides and peptoids
Source: PubMed Central journal article supplement (PMC5711933; doi:10.1038/s41598-017-16180-0), 2017-12-01
Supplement: 41598_2017_16180_MOESM1_ESM.pdf [file 41598_2017_16180_MOESM1_ESM.pdf]

## Supplementary Information

# Intracellular biomass flocculation as a key mechanism of rapid bacterial killing by cationic, amphipathic antimicrobial peptides and peptoids

Nathaniel P. Chongsiriwatana<sup>1</sup>, Jennifer S. Lin<sup>2</sup>, Rinki Kapoor<sup>3</sup>, Modi Wetzler<sup>2</sup>, Jennifer A. C. Rea<sup>1</sup>, Maruti K. Didwania<sup>2</sup>, Christopher H. Contag<sup>4</sup> and Annelise E. Barron<sup>2\*</sup>

<sup>1</sup>Department of Chemical and Biological Engineering, Northwestern University, Evanston, Illinois;

<sup>2</sup>Department of Bioengineering, <sup>3</sup>Biophysics Program, and <sup>4</sup>Departments of Microbiology and Immunology, Pediatrics, and Radiology, Stanford University, Stanford, California

\*Annelise E. Barron

Associate Professor

Department of Bioengineering, Stanford University

Shriram Center, Room 229

443 Via Ortega

Stanford, CA 94305

Phone: 650-946-8039

E-mail: [aebarron@stanford.edu](mailto:aebarron@stanford.edu)

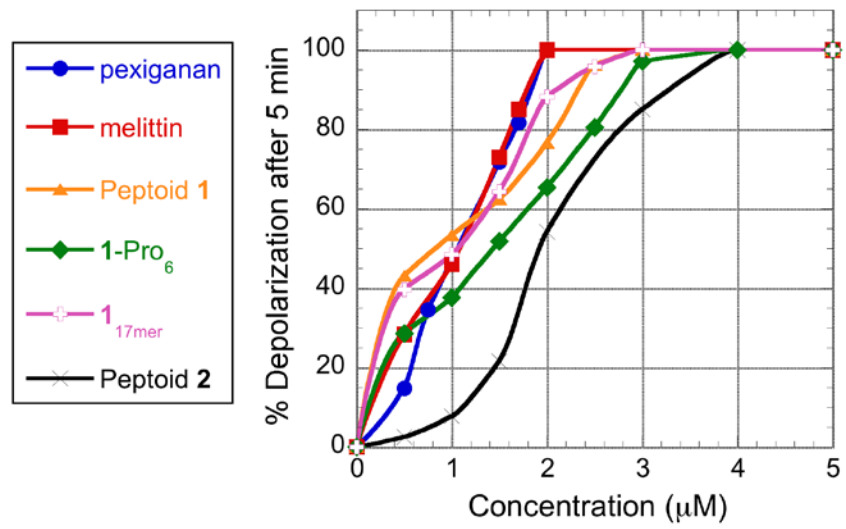

**Figure S1.** Membrane depolarization of *B. subtilis* ATCC 6633 after 5-min. treatment, as monitored by diSC3-5 fluorescence. The data are representative of 3 independent experiments.

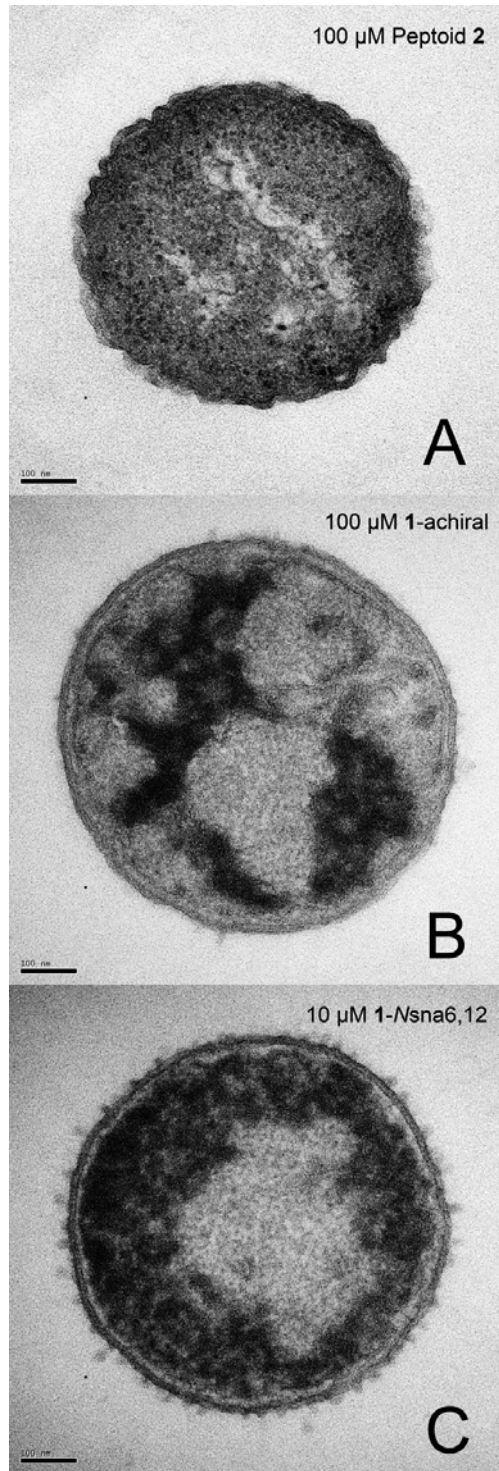

**Figure S2.** Transmission electron micrographs of *E. coli* bacteria treated with (A) 100  $\mu$ M peptoid 2, (B) 100  $\mu$ M 1-achiral, or (C) 10  $\mu$ M 1-Nsna6,12 for 1 hour.

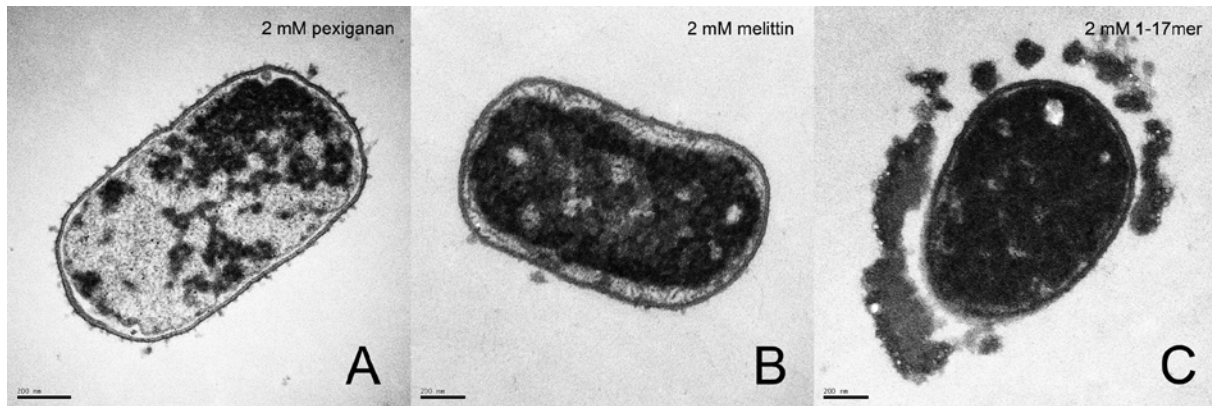

**Figure S3.** Transmission electron micrographs of longitudinal sections of *E. coli* bacteria treated with 2 mM (A) pexiganan, (B) melittin, and (C) peptoid **1**<sub>17mer</sub>.

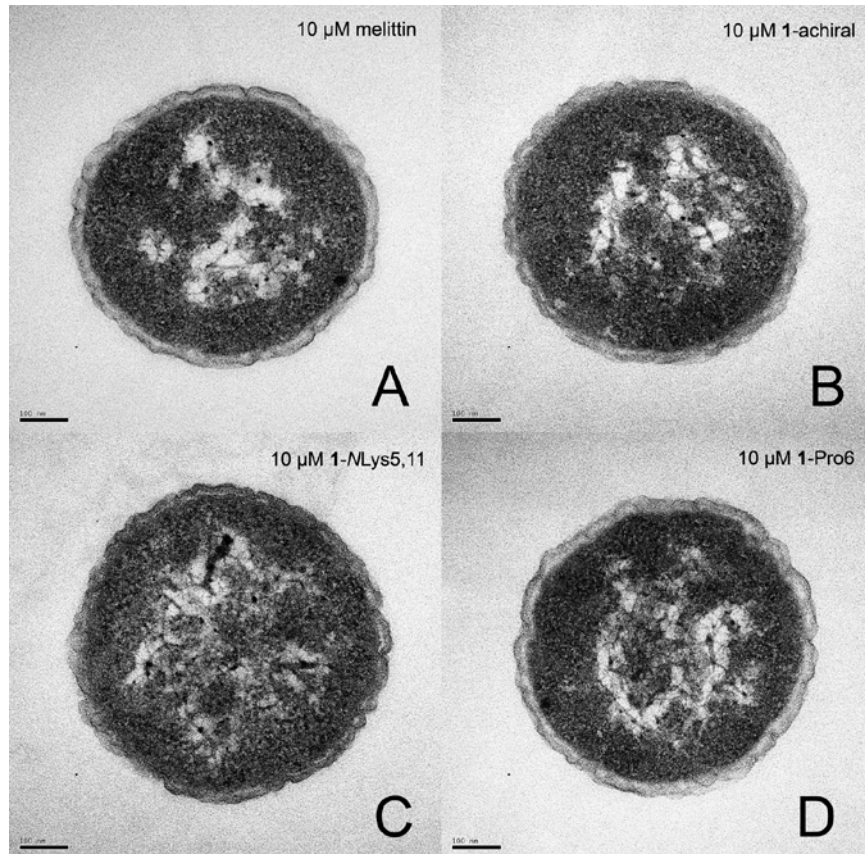

**Figure S4.** Transmission electron micrographs showing *E. coli* treated with sub-lethal concentrations (i.e. concentrations which killed none of the bacteria in each sample) of (A) 10  $\mu$ M melittin, (B) 10  $\mu$ M **1**-achiral, (C) 10  $\mu$ M **1**-NLys<sub>5,11</sub>, and (D) 10  $\mu$ M **1**-Pro<sub>6</sub>.

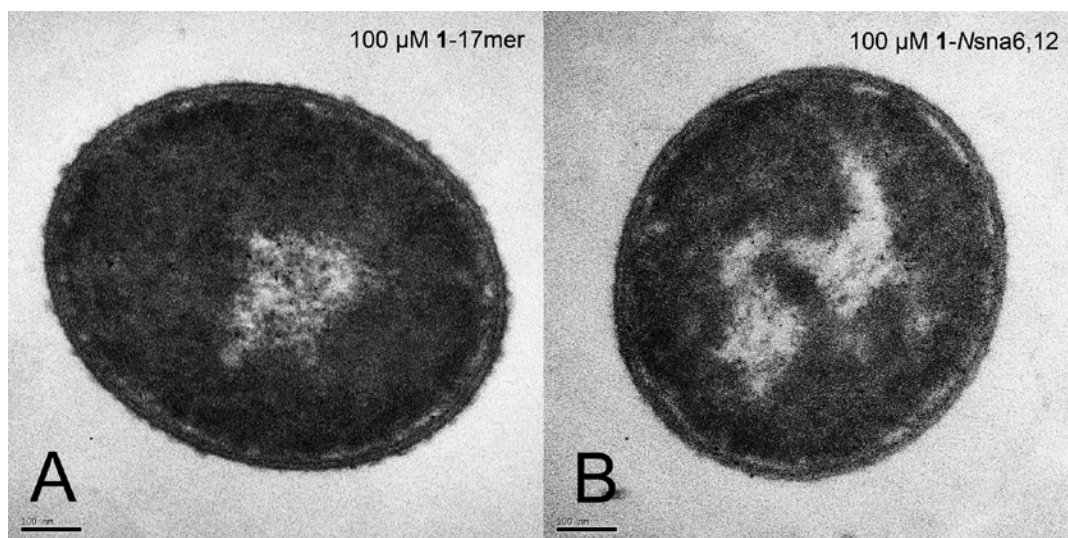

**Figure S5.** Transmission electron micrographs of *E. coli* treated with 100  $\mu$ M peptoids (A) **1**<sub>17mer</sub> and (B) **1**-N<sub>sna6,12</sub> for 1 hour.

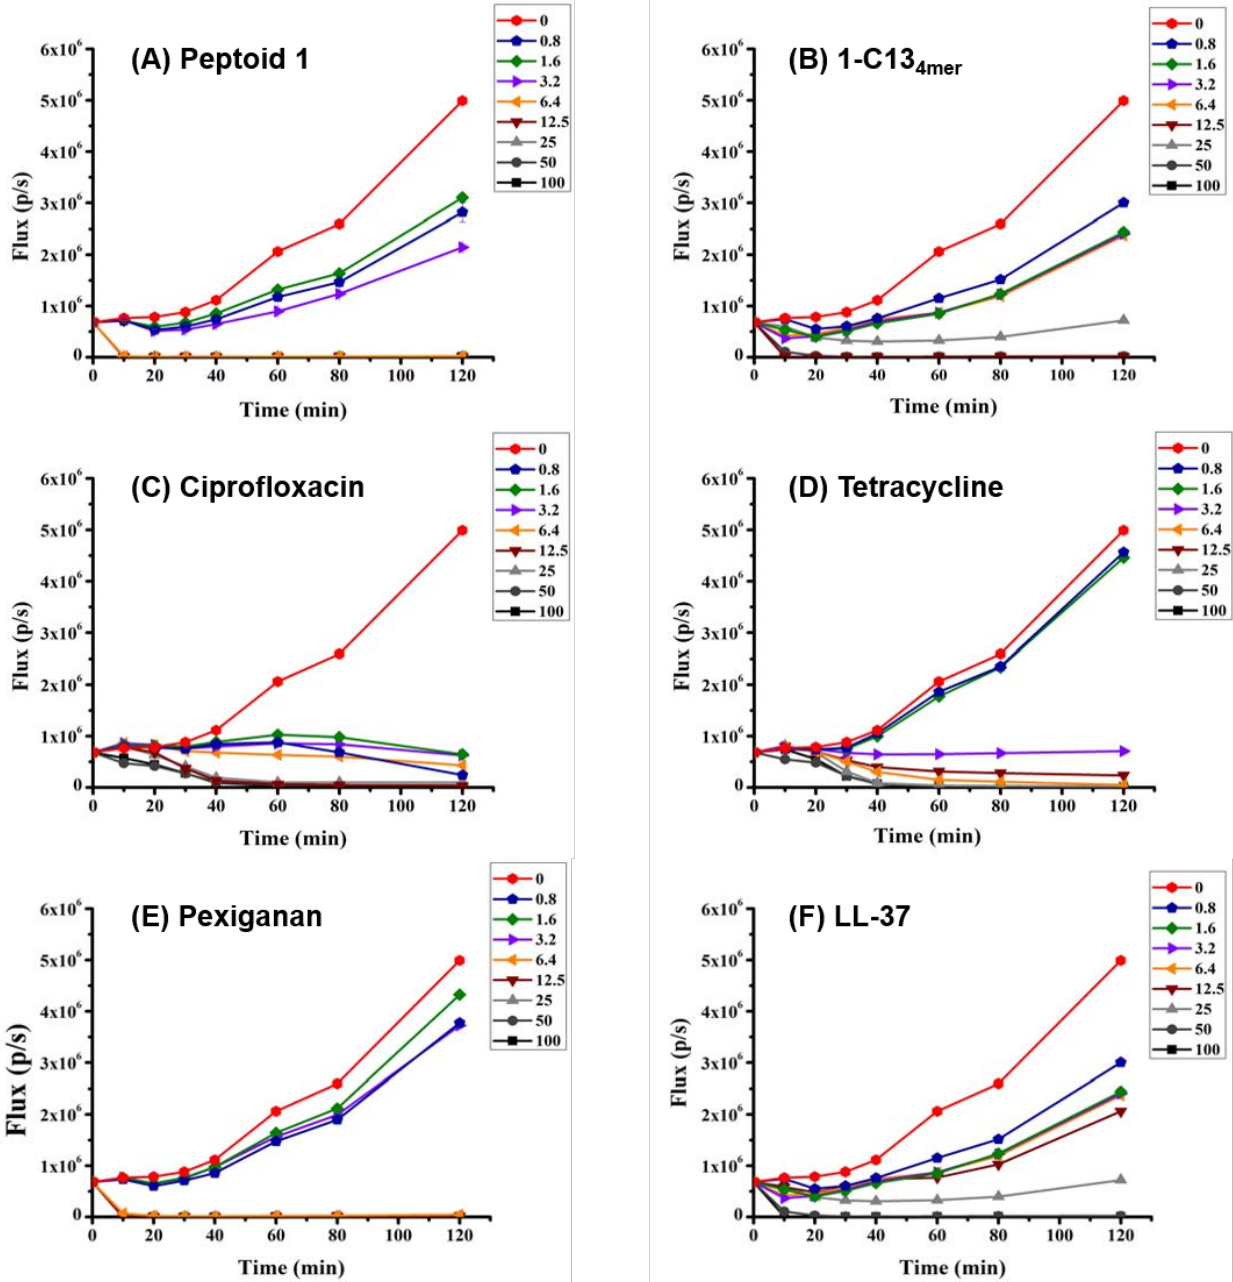

**Figure S6.** Kinetics of antibacterial activities of (A) Peptoid 1, (B) 1-C13<sub>4mer</sub>, (C) Ciprofloxacin, (D) Tetracycline, (E) Pexiganan, and (F) LL-37 against bioluminescent *P. aeruginosa* from 0 - 100  $\mu\text{M}$  in LB at 37  $^\circ\text{C}$ . Flux represents number of photons emitted by bacteria per second. Reported values are average of three independent experiments with two replicates each.

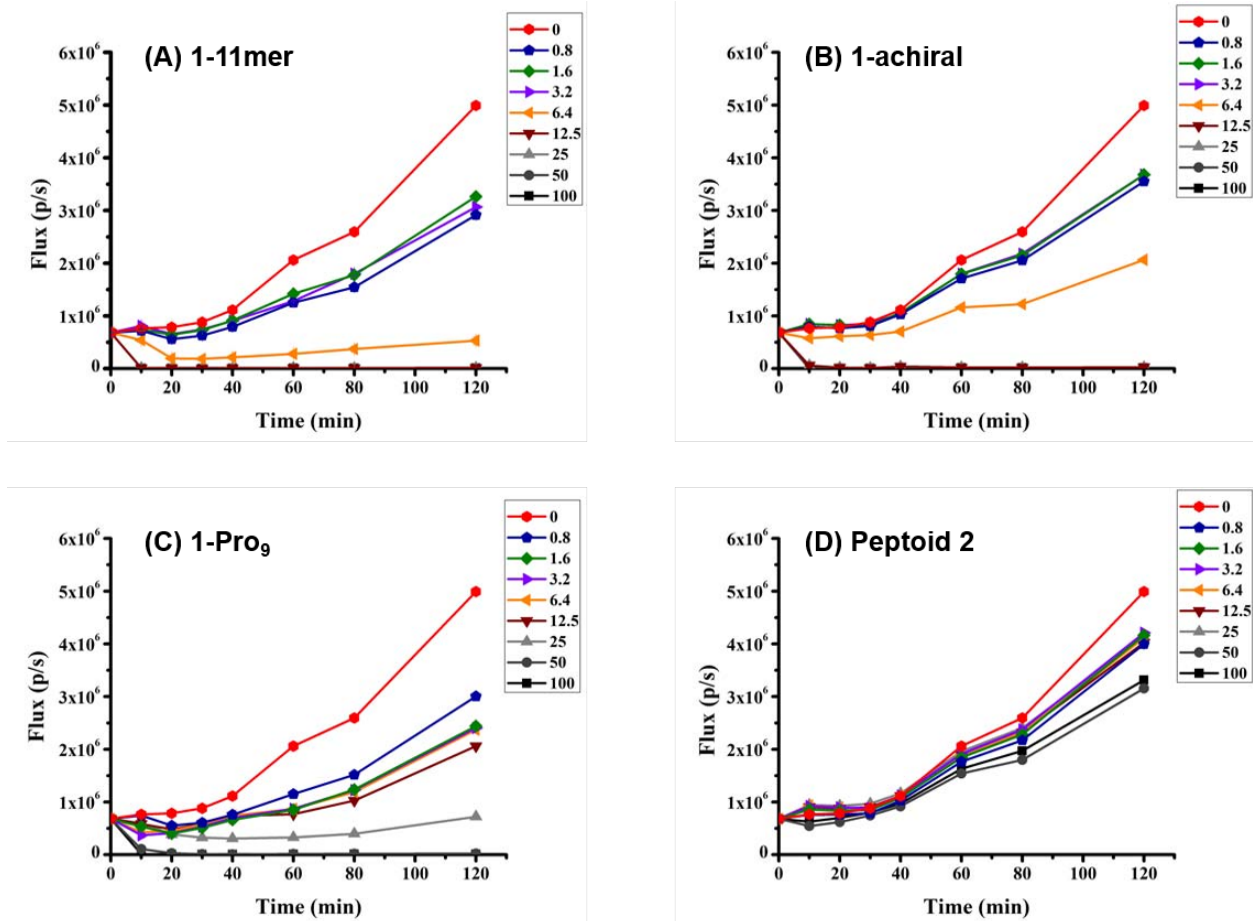

**Figure S7.** Kinetics of antibacterial activities of (A) 1-11mer, (B) 1-achiral, (C) 1-Pro<sub>9</sub>, and (D) Peptoid 2 against bioluminescent *P. aeruginosa* from 0 - 100  $\mu$ M in LB at 37  $^{\circ}$ C. Flux represents number of photons emitted by bacteria per second. Reported values are average of three independent experiments with two replicates each.
